# Supplementary material
Source: ML conference proceedings conference paper supplement (https://openreview.net/forum?id=cR5GTis5II)

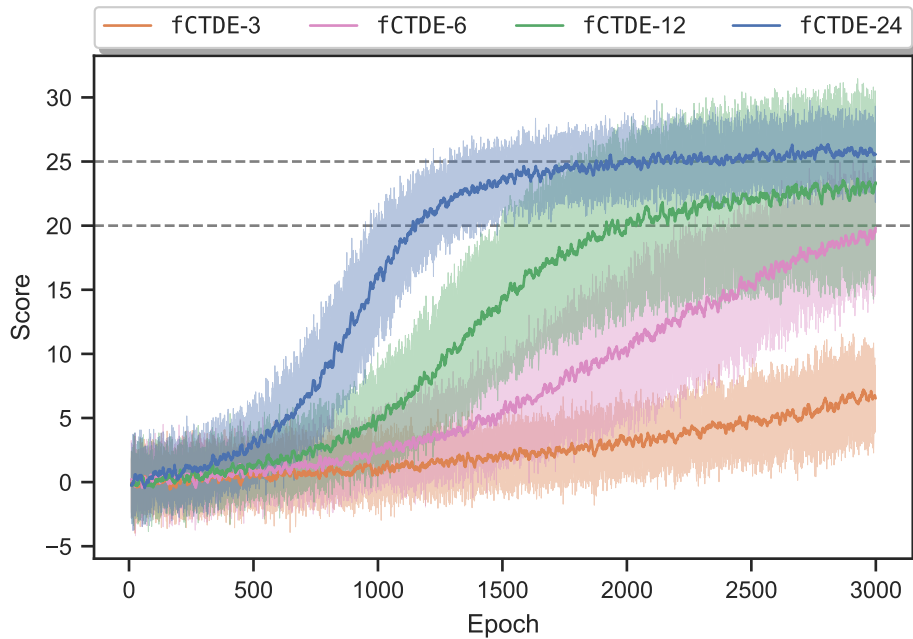

Supplement: supplementary_material [file attachment]

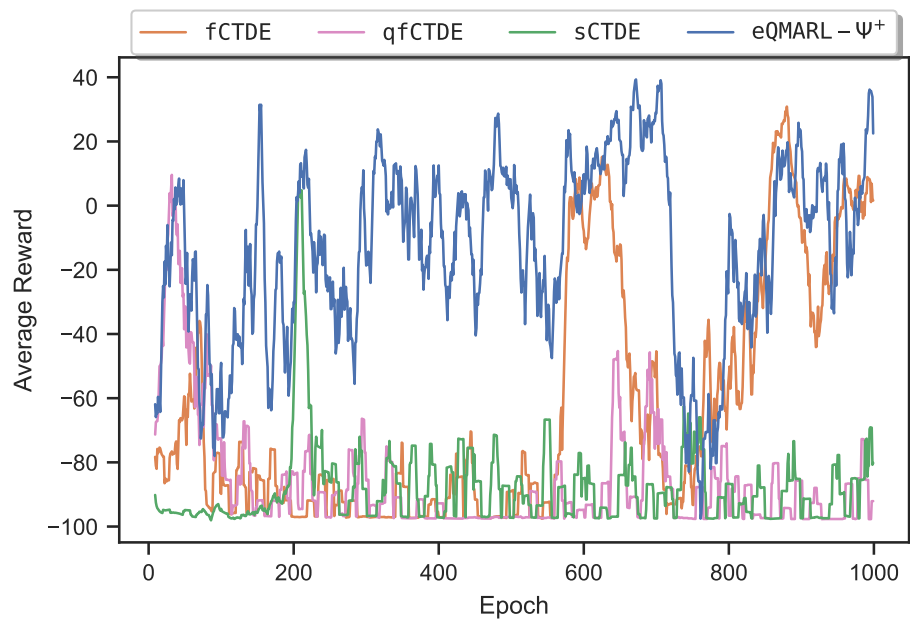

Figure R.1: MiniGrid reward performance for 2 agents over 1000 epochs, with a maximum step limit of 50.

Supplement: supplementary_material [file attachment]

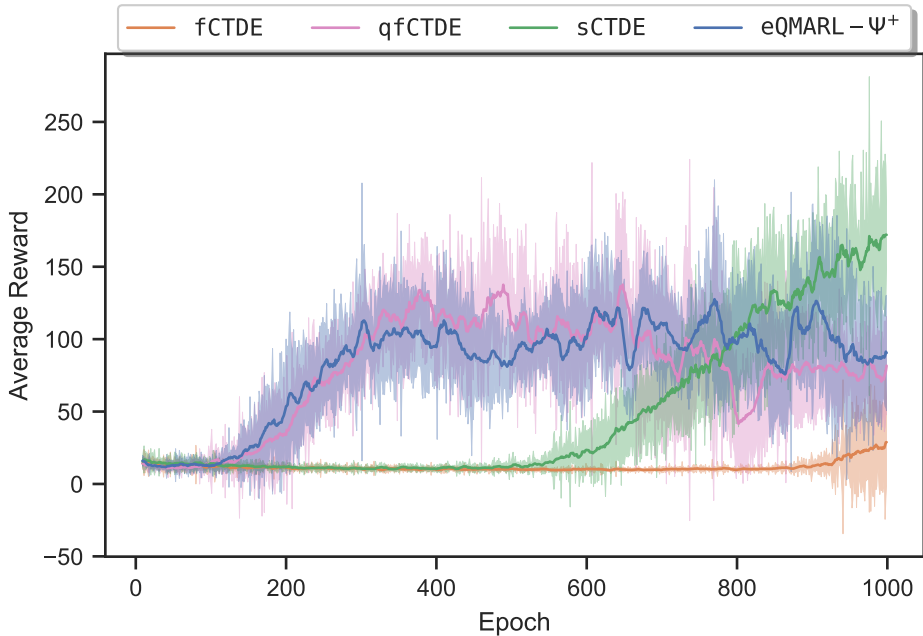

Supplement: supplementary_material [file attachment]

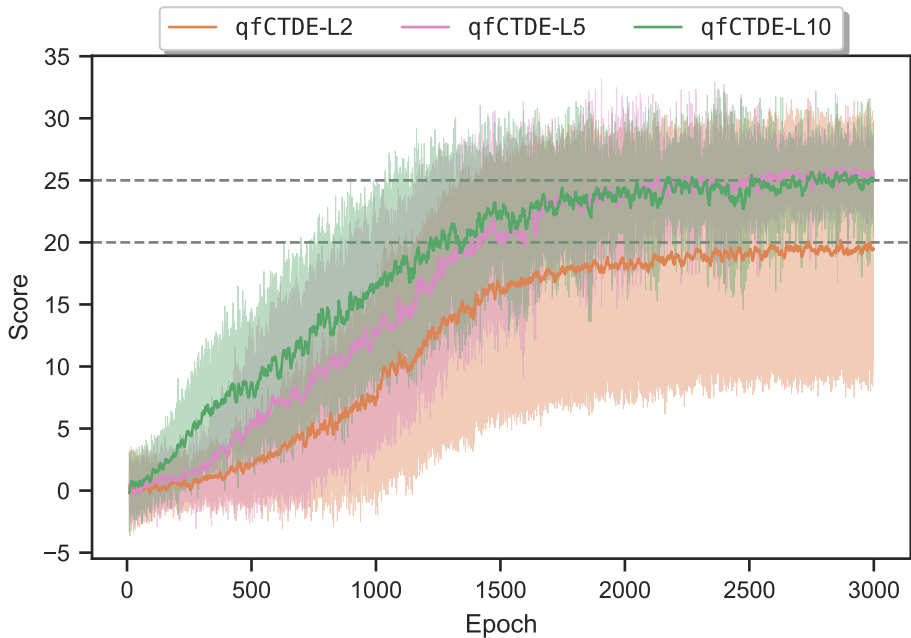

Supplement: supplementary_material [file attachment]

Own Coins Collected

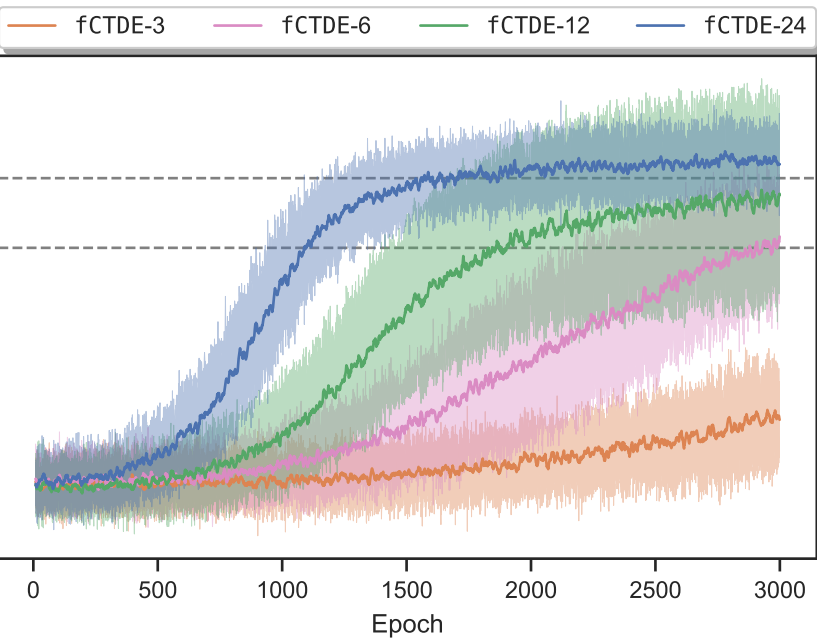

Supplement: supplementary_material [file attachment]

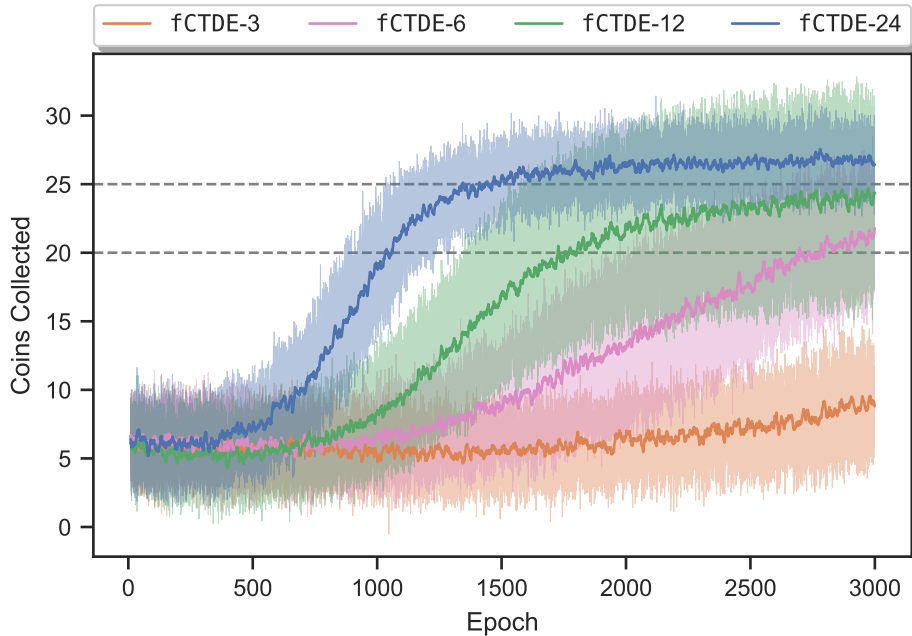

Supplement: supplementary_material [file attachment]

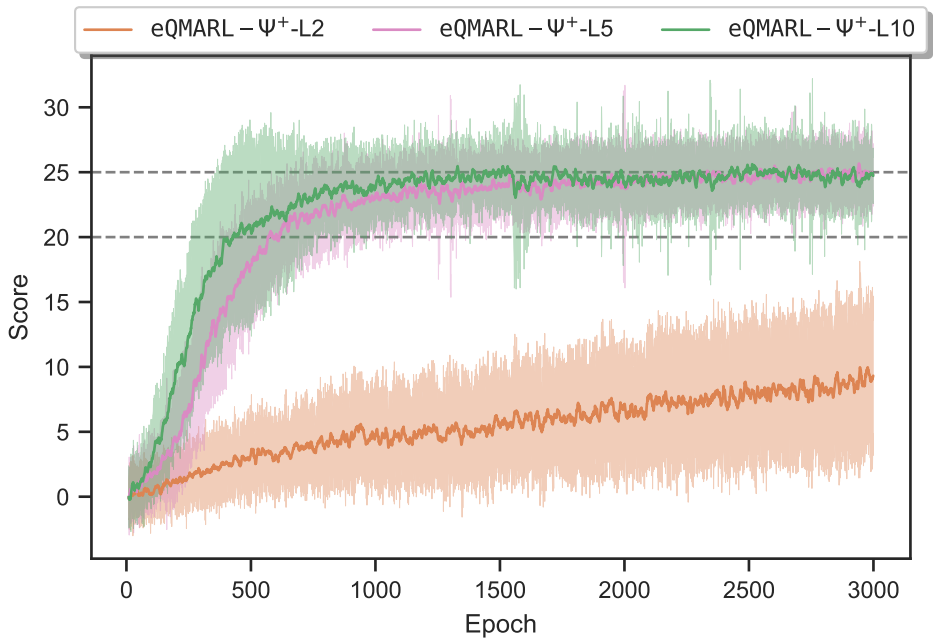

Supplement: supplementary_material [file attachment]

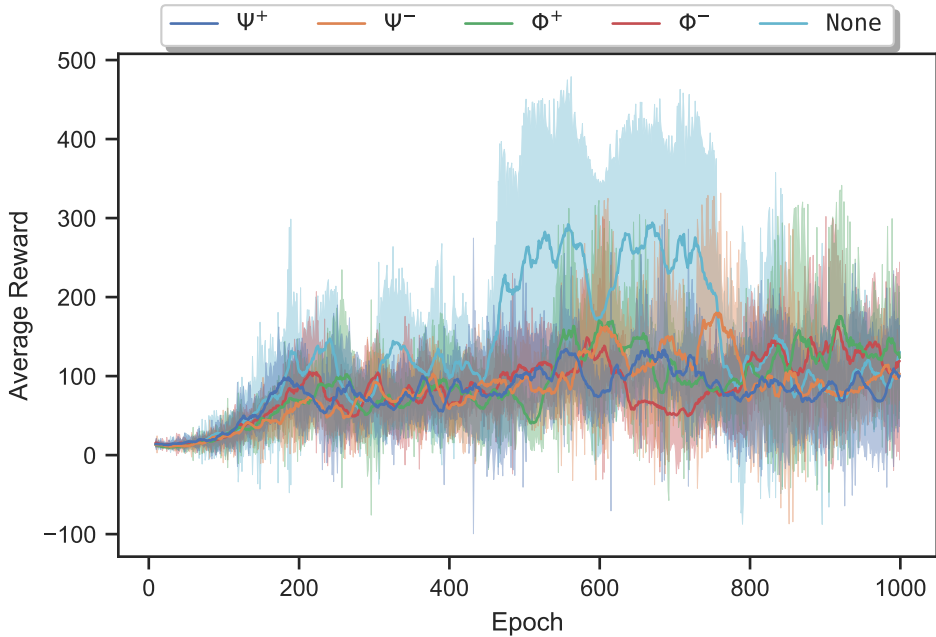

Supplement: supplementary_material [file attachment]

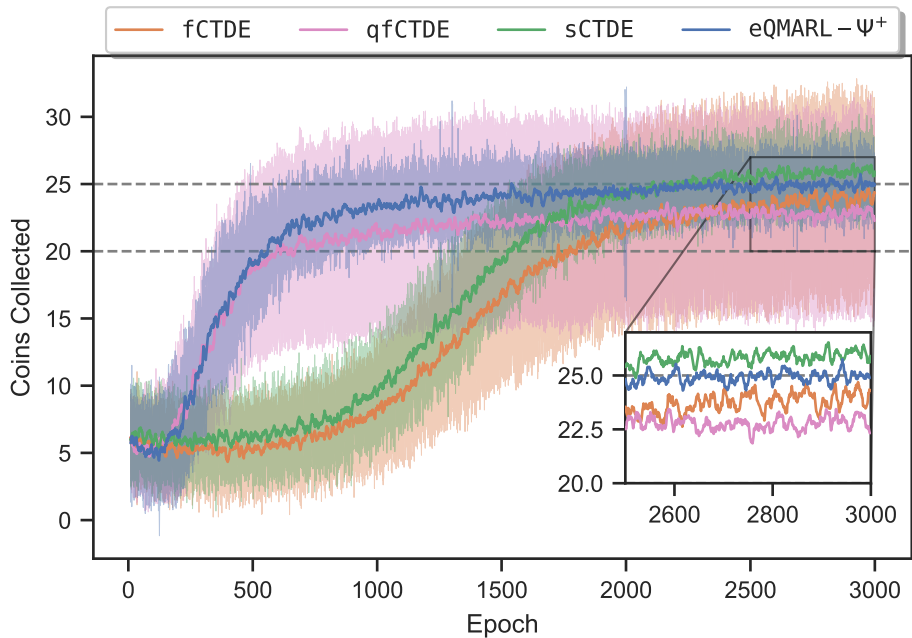

Supplement: supplementary_material [file attachment]

Own Coins Collected

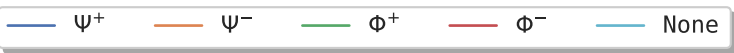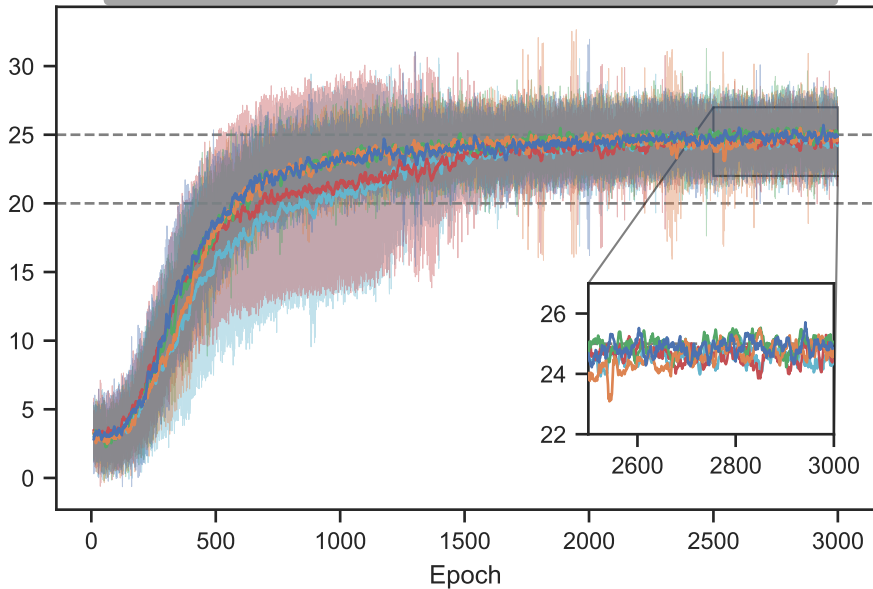

Supplement: supplementary_material [file attachment]

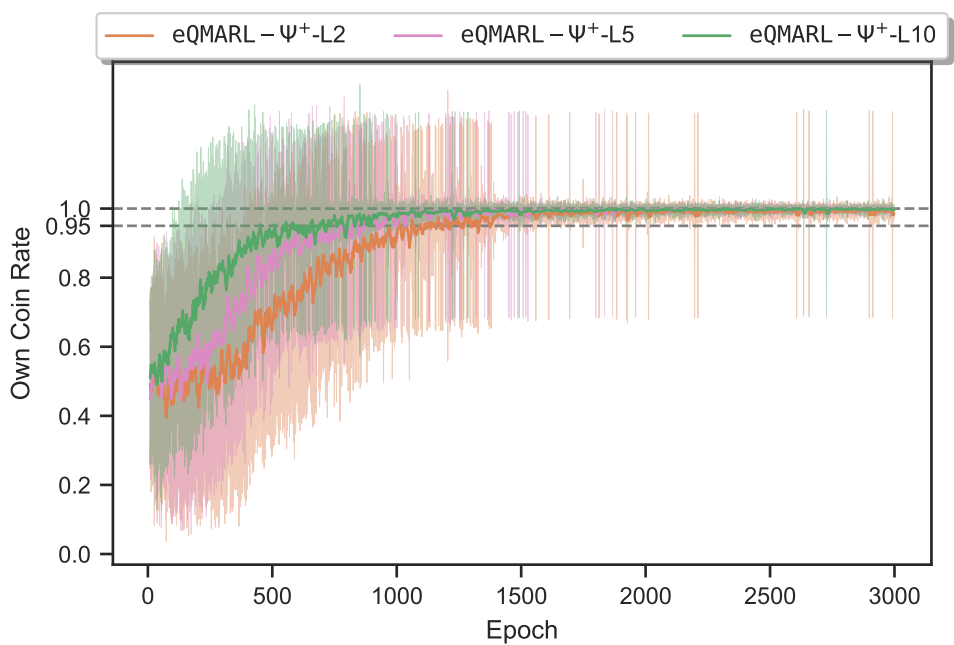

Supplement: supplementary_material [file attachment]

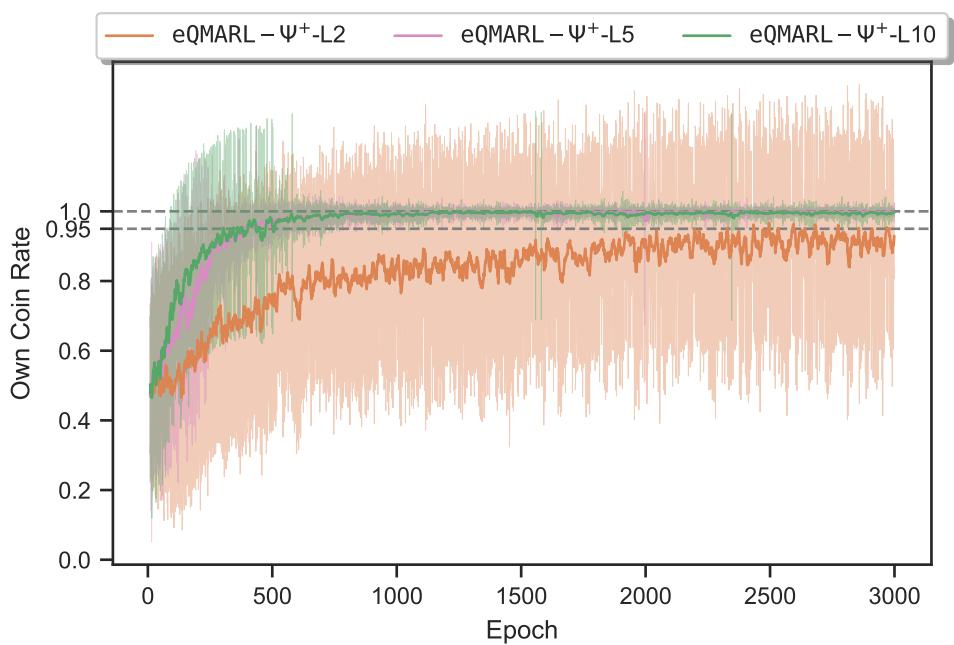

Supplement: supplementary_material [file attachment]

Own Coins Collected

qfCTDE-L2      qfCTDE-L5      qfCTDE-L10

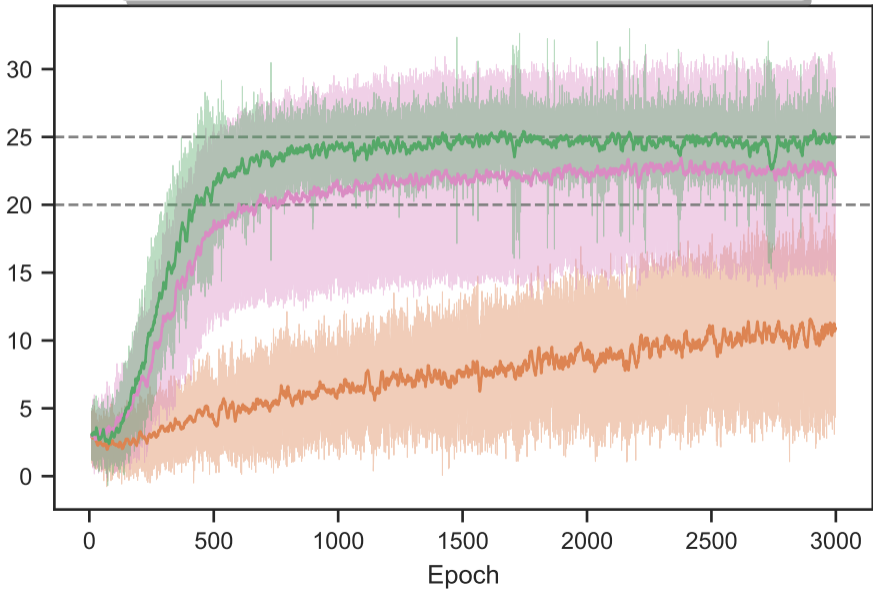

Supplement: supplementary_material [file attachment]

Own Coins Collected

qfCTDE-L2      qfCTDE-L5      qfCTDE-L10

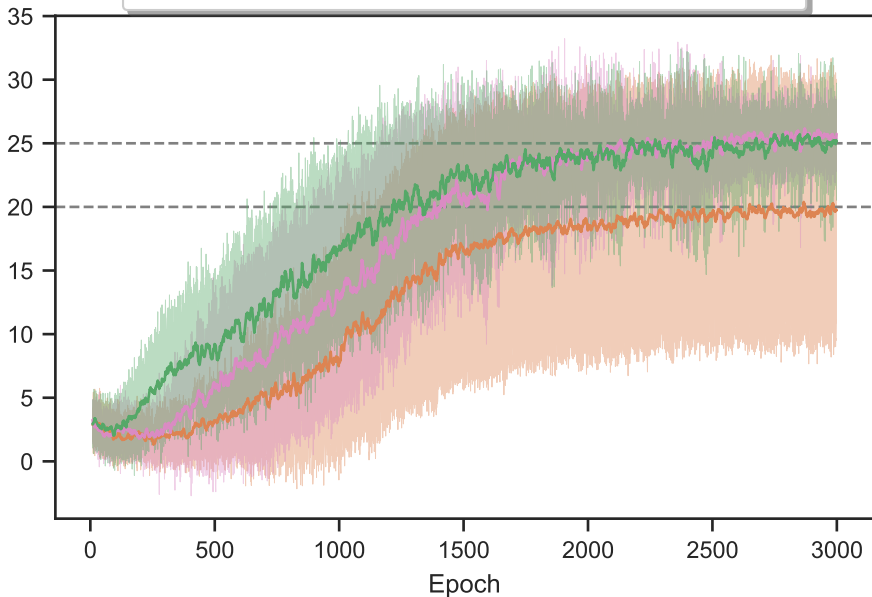

Supplement: supplementary_material [file attachment]

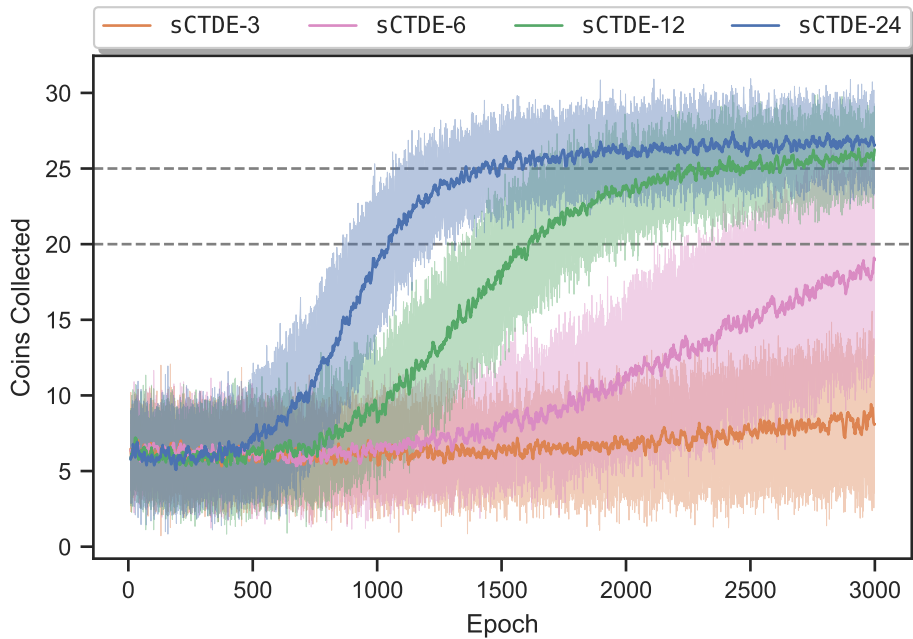

Supplement: supplementary_material [file attachment]

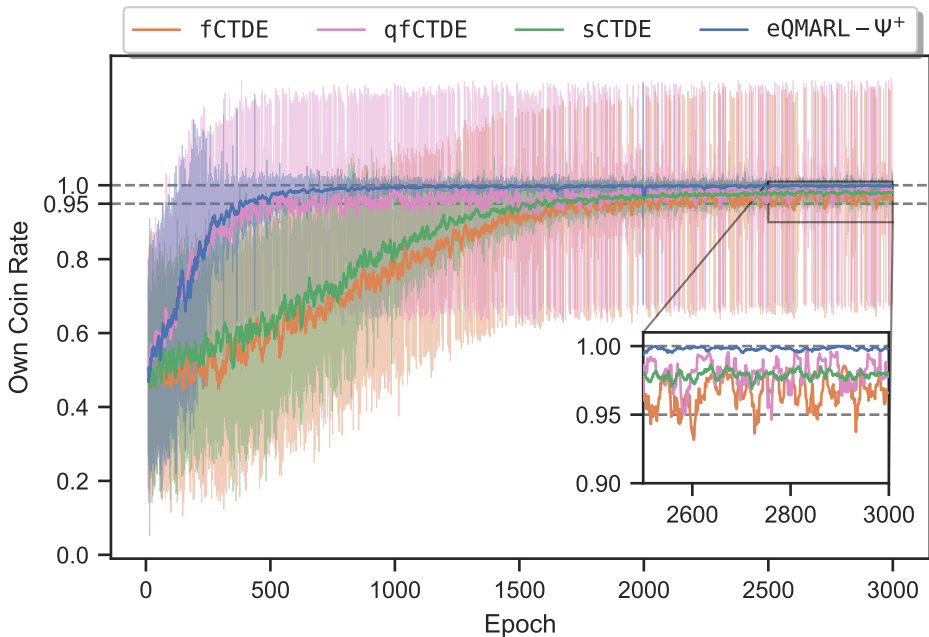

Supplement: supplementary_material [file attachment]

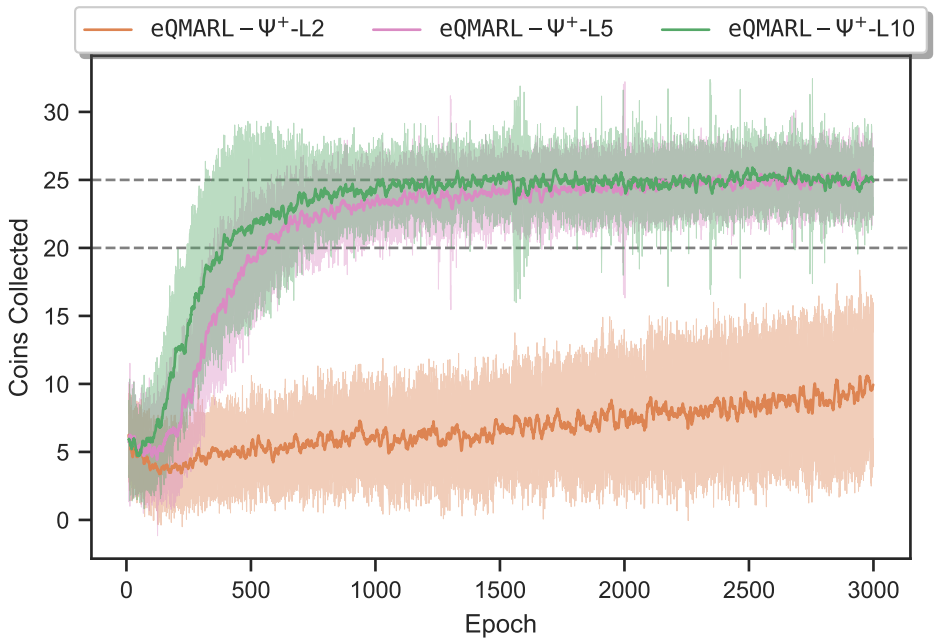

Supplement: supplementary_material [file attachment]

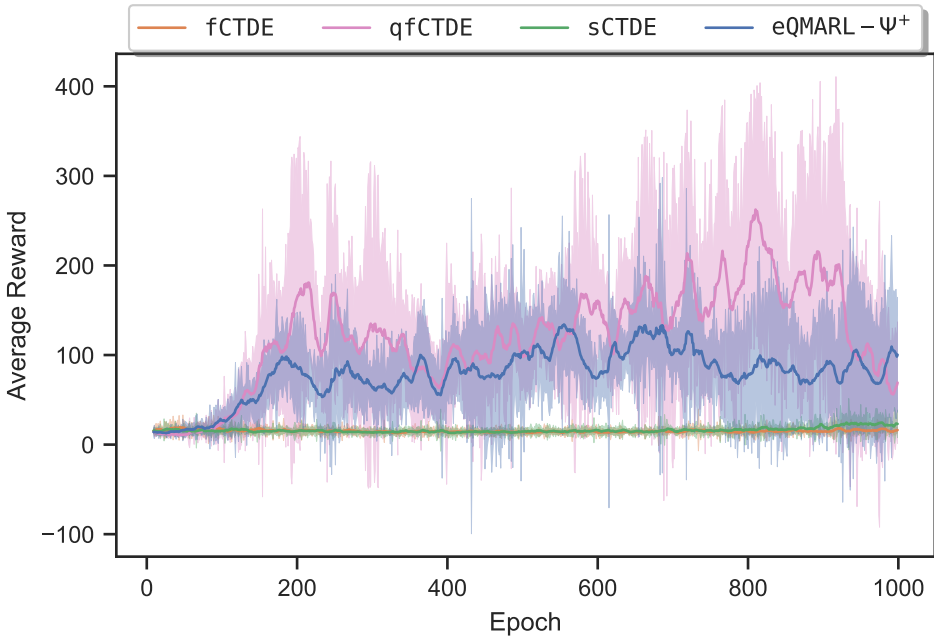

Supplement: supplementary_material [file attachment]

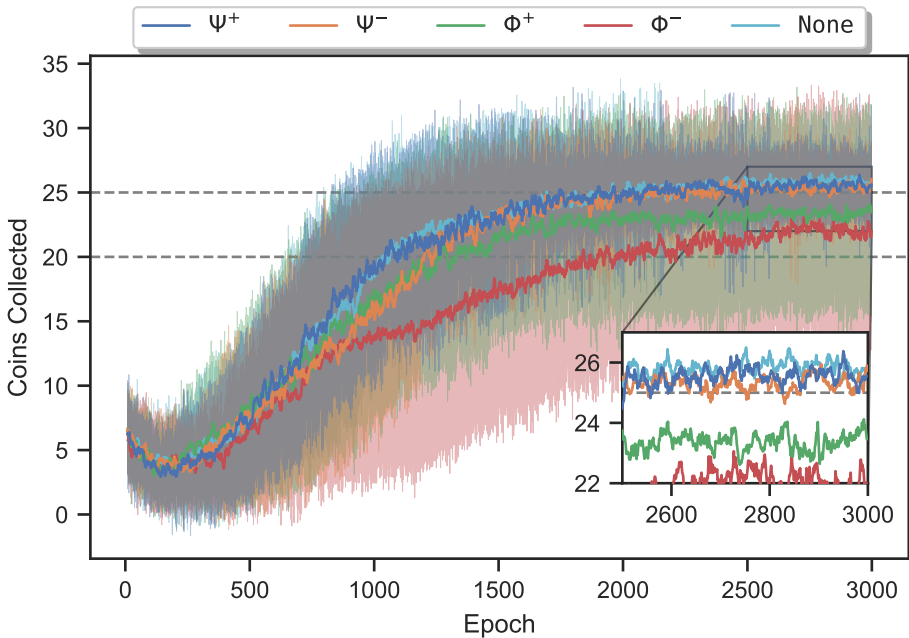

Supplement: supplementary_material [file attachment]

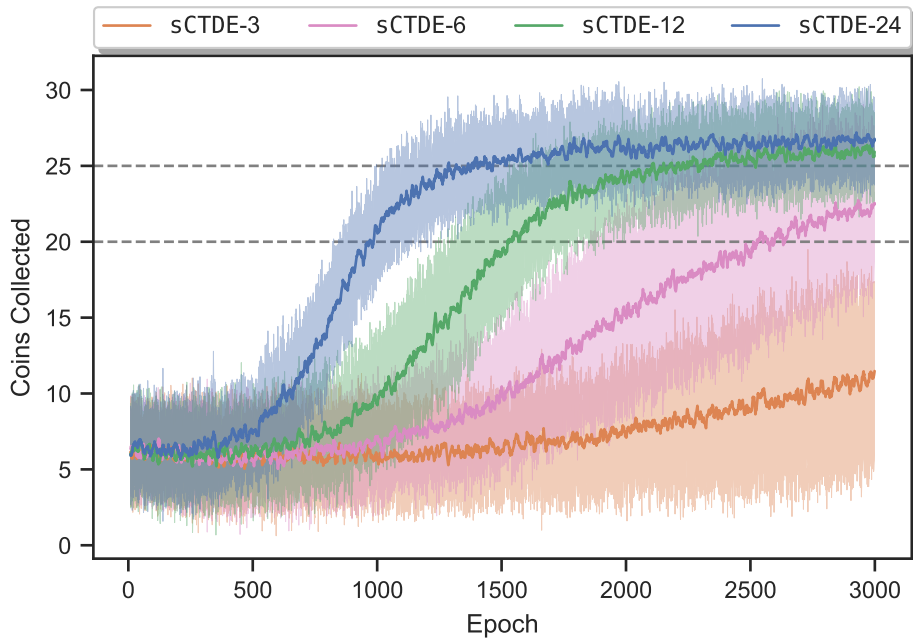

Supplement: supplementary_material [file attachment]

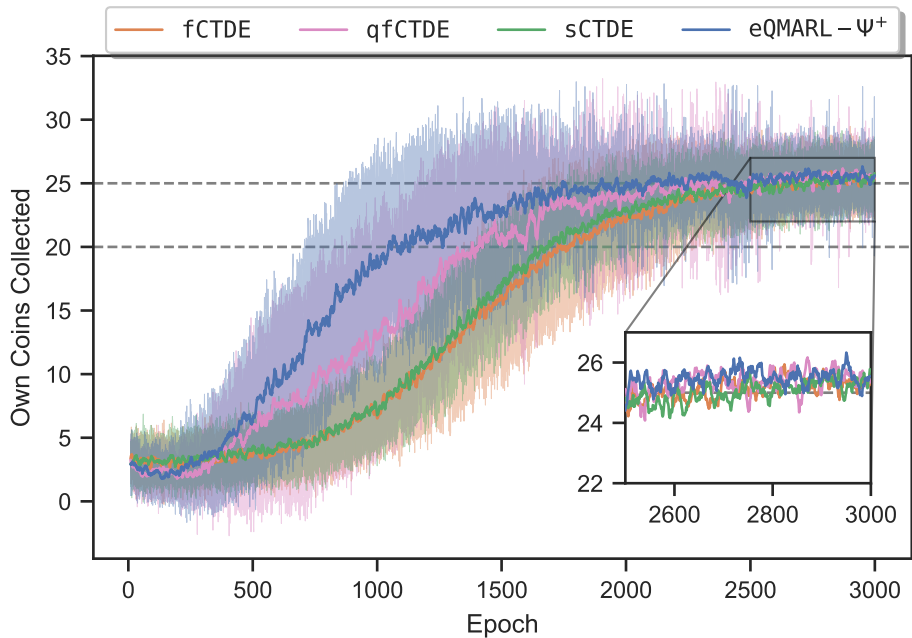

Supplement: supplementary_material [file attachment]

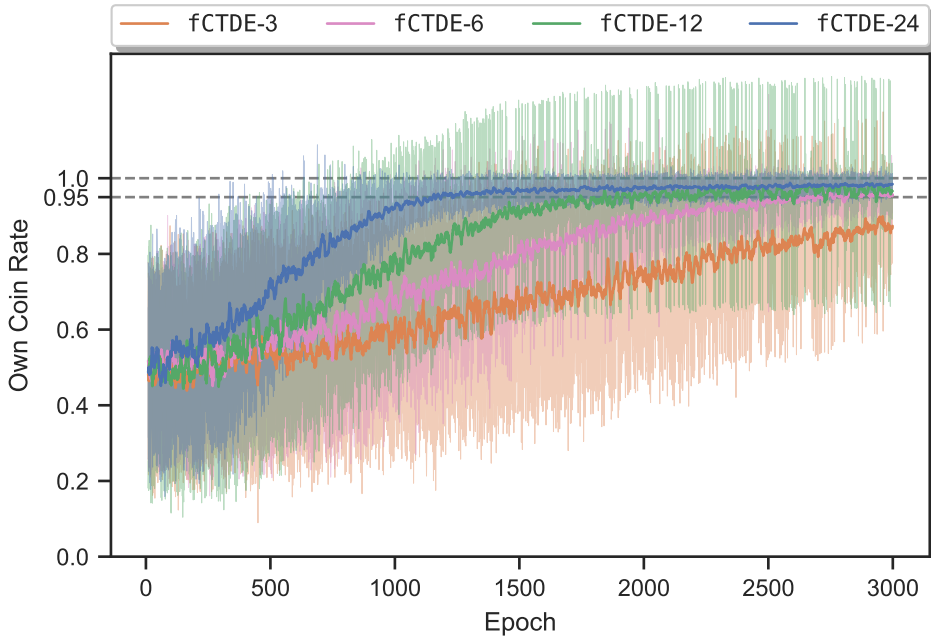

Supplement: supplementary_material [file attachment]

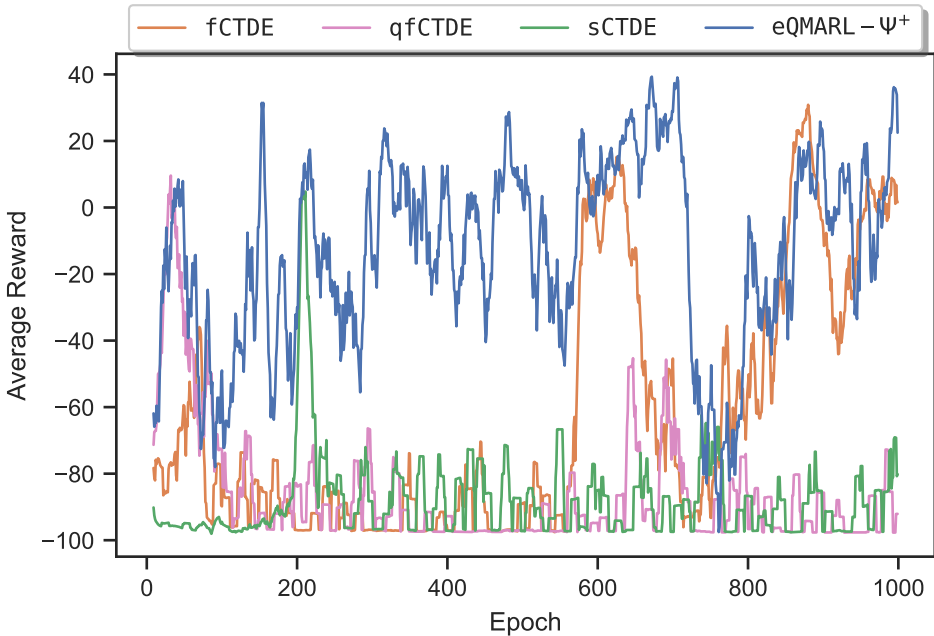

Supplement: supplementary_material [file attachment]

Own Coins Collected

eQMARL -  $\Psi^+$ -L2      eQMARL -  $\Psi^+$ -L5      eQMARL -  $\Psi^+$ -L10

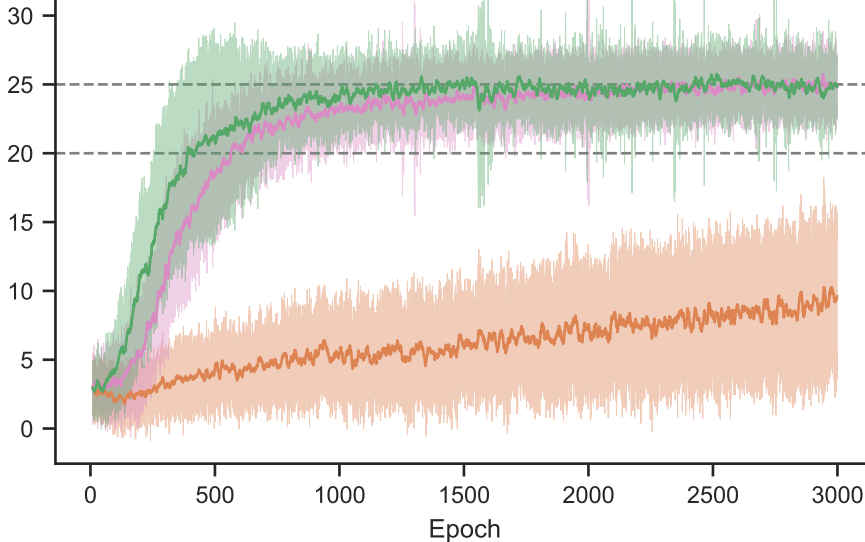

Supplement: supplementary_material [file attachment]

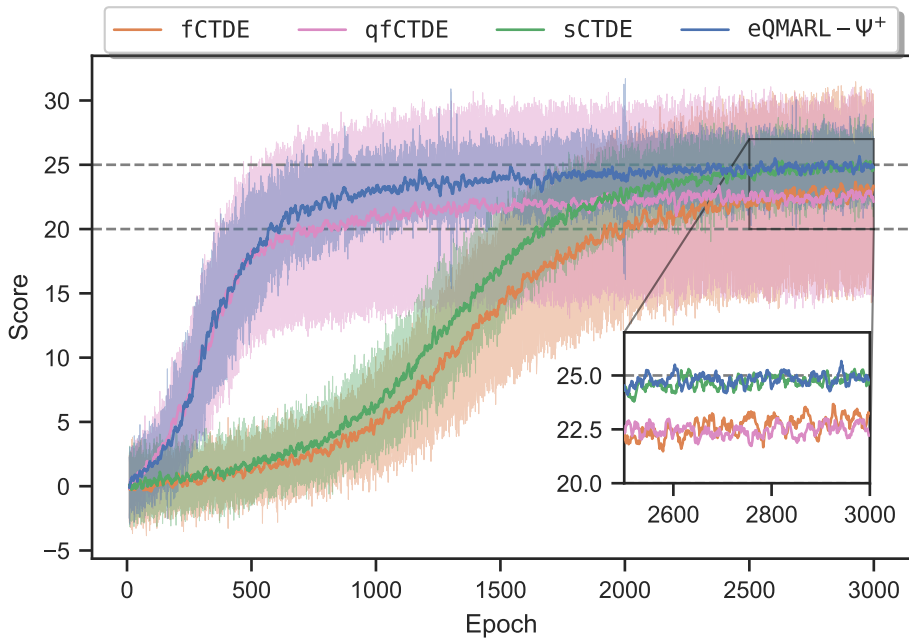

Supplement: supplementary_material [file attachment]

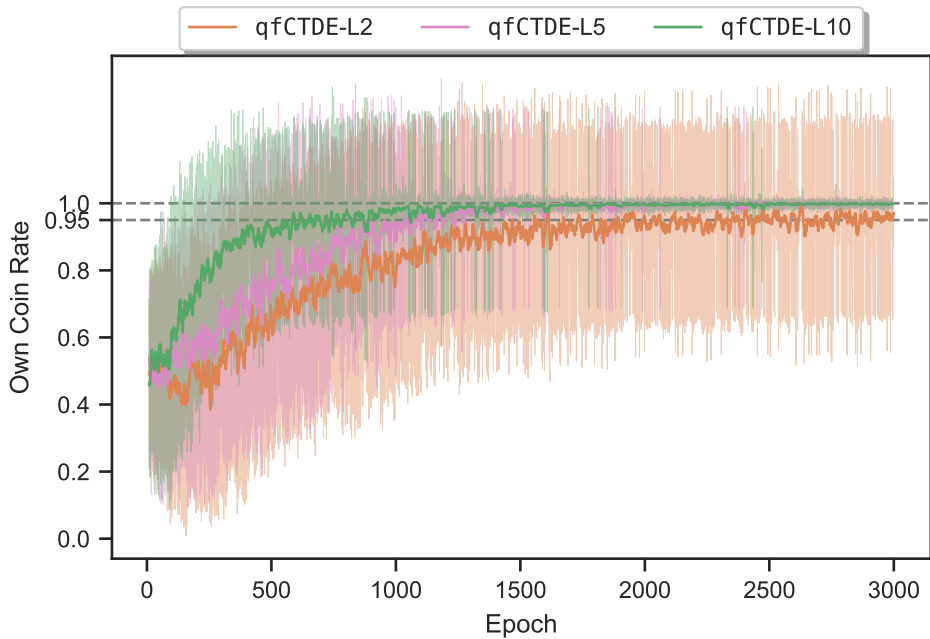

Supplement: supplementary_material [file attachment]

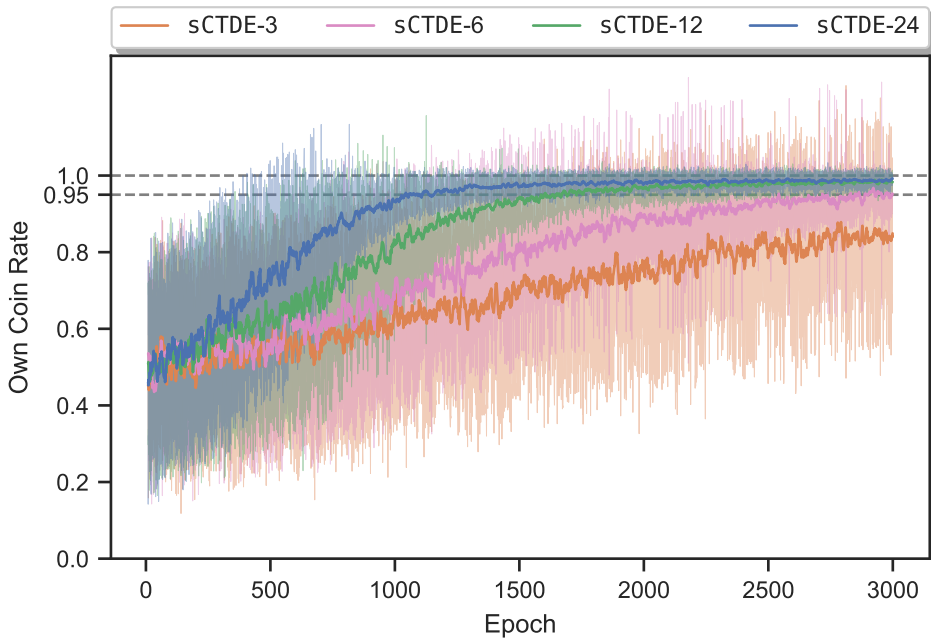

Supplement: supplementary_material [file attachment]

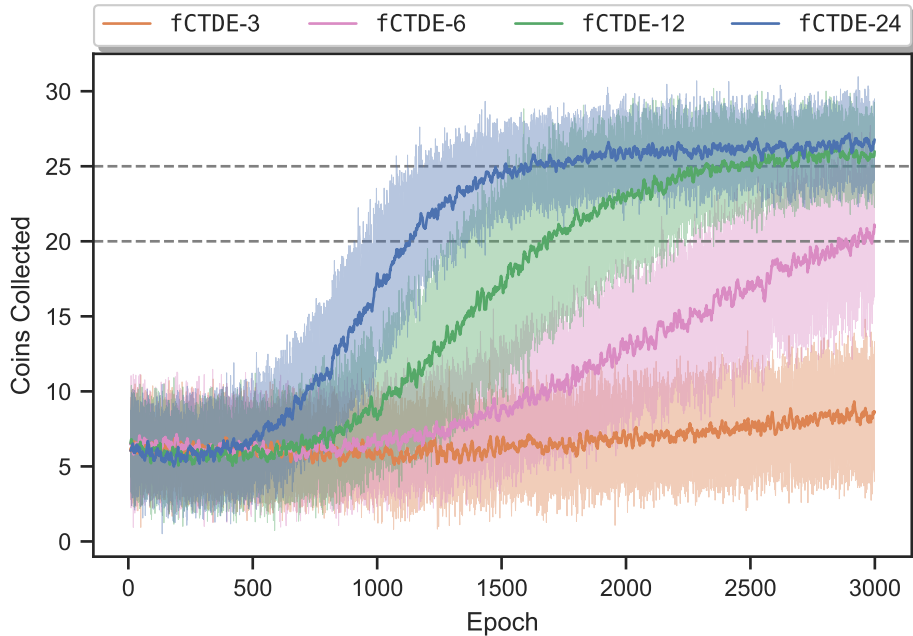

Supplement: supplementary_material [file attachment]

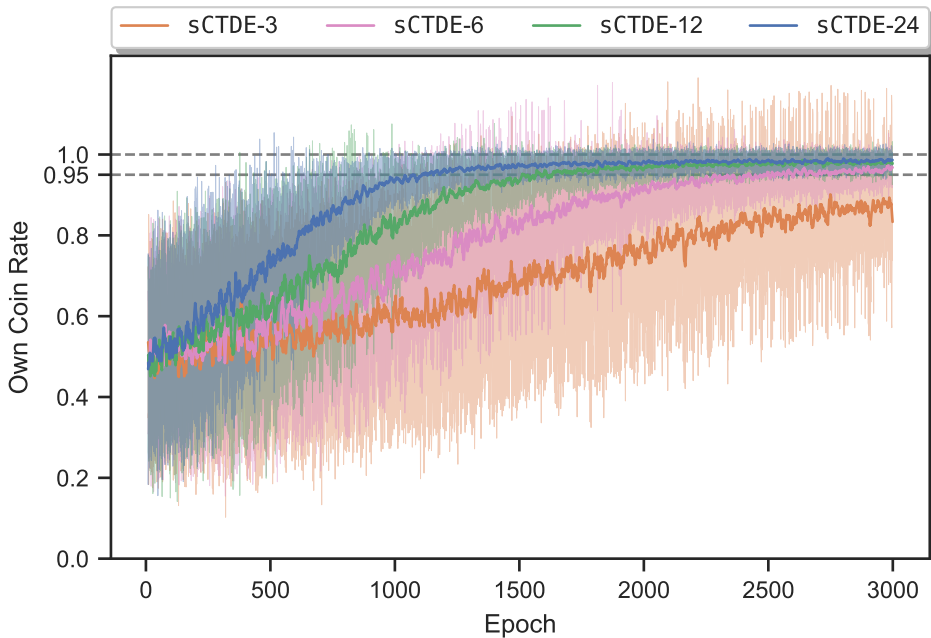

Supplement: supplementary_material [file attachment]

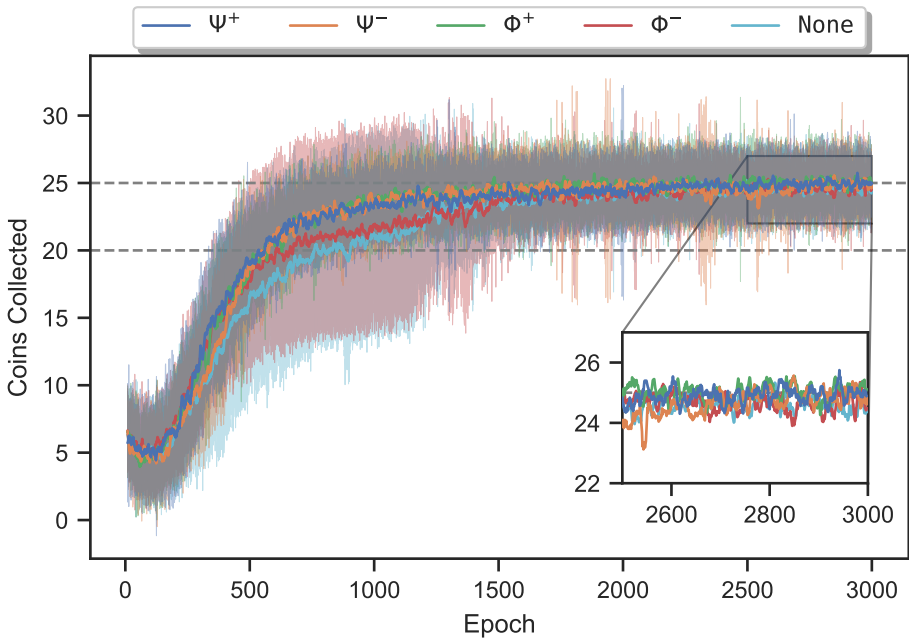

Supplement: supplementary_material [file attachment]

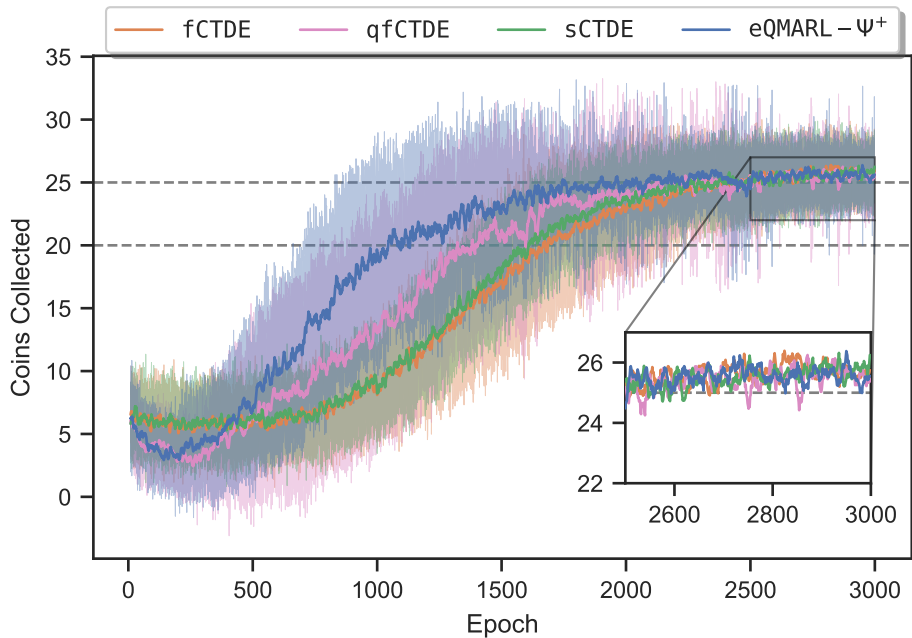

Supplement: supplementary_material [file attachment]

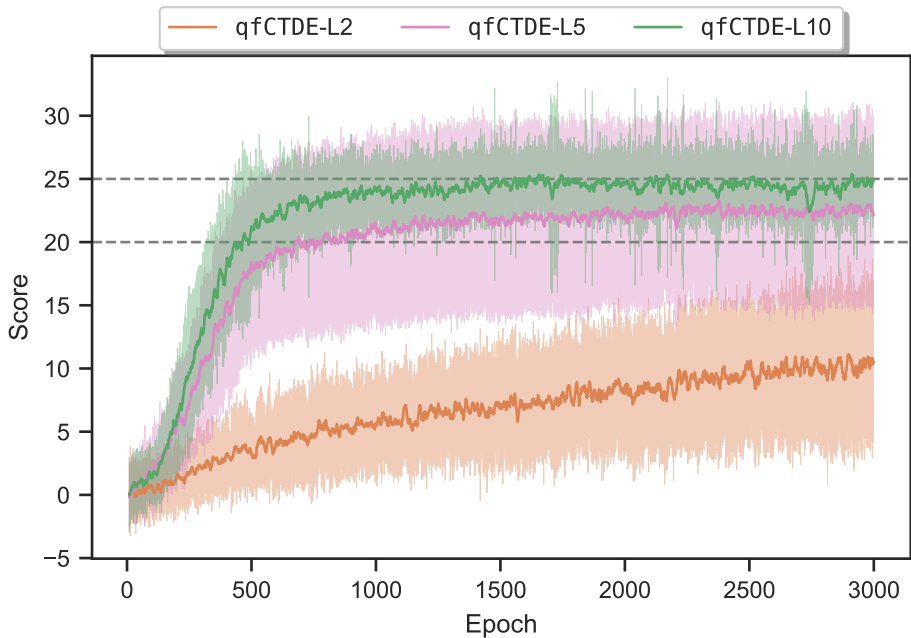

Supplement: supplementary_material [file attachment]

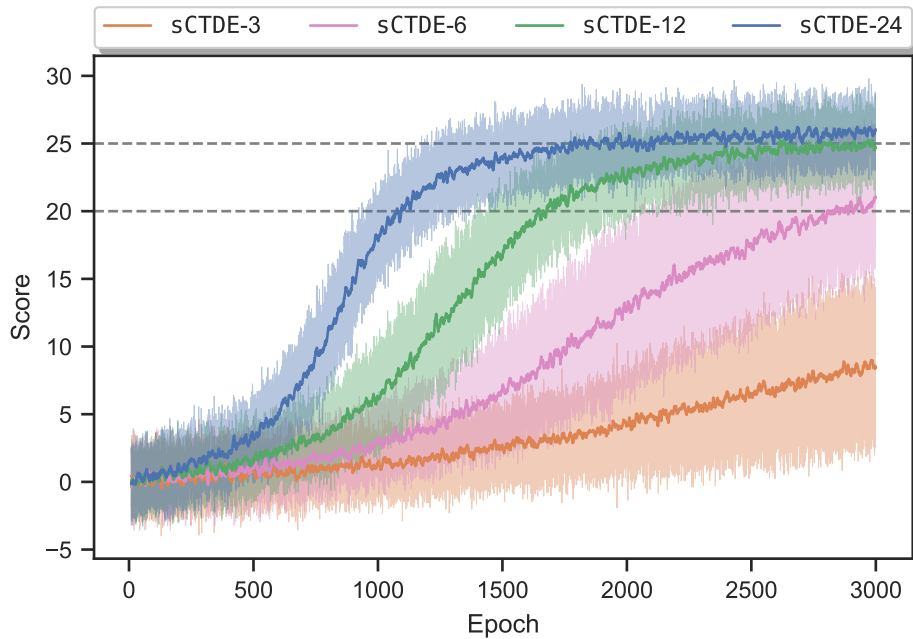

Supplement: supplementary_material [file attachment]

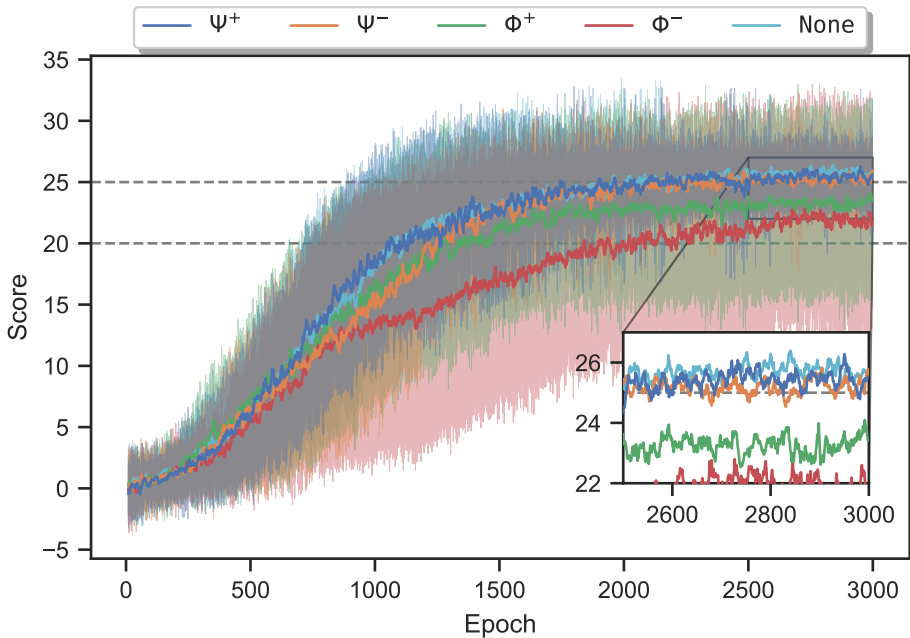

Supplement: supplementary_material [file attachment]

Own Coins Collected

fCTDE    qfCTDE    sCTDE    eQMARL -  $\Psi^+$

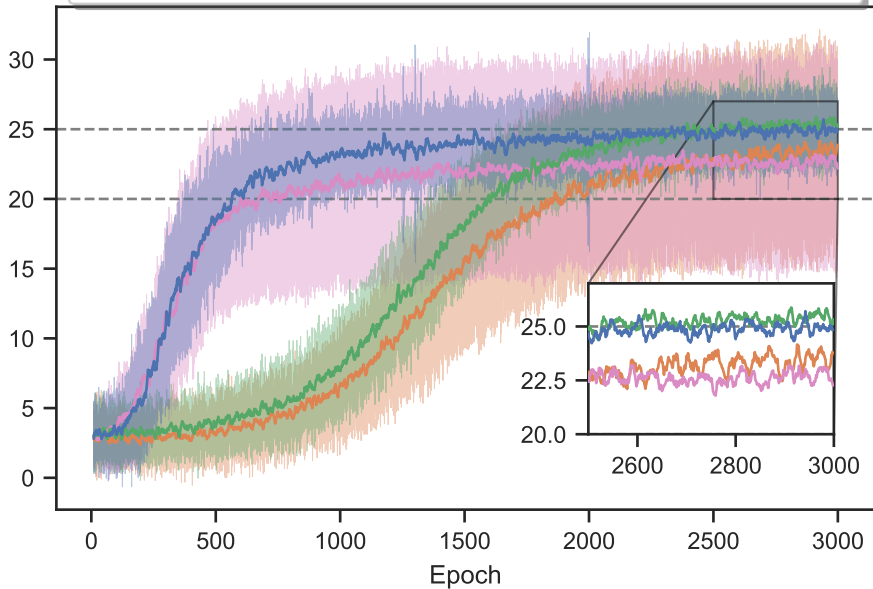

Supplement: supplementary_material [file attachment]

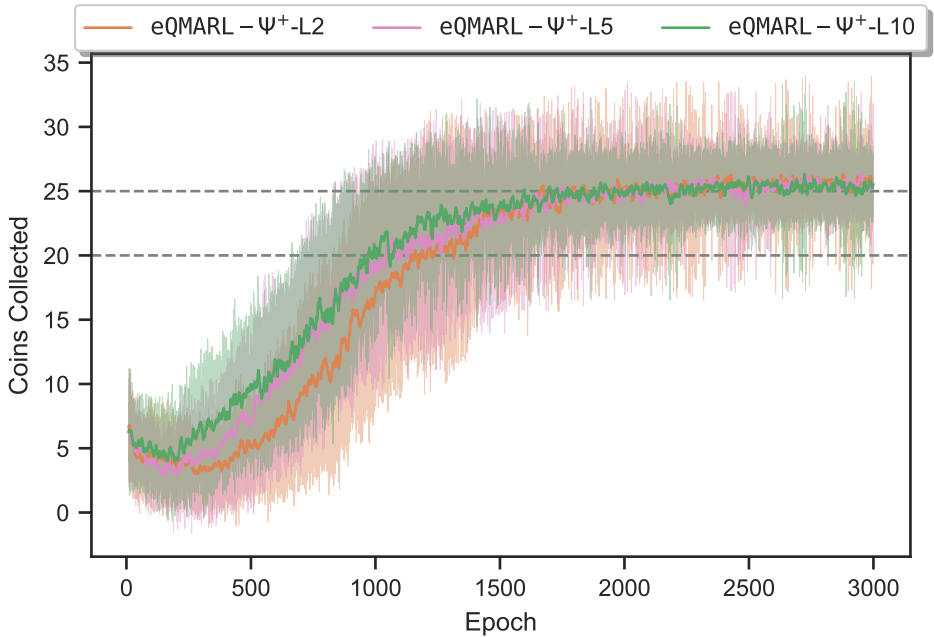

Supplement: supplementary_material [file attachment]

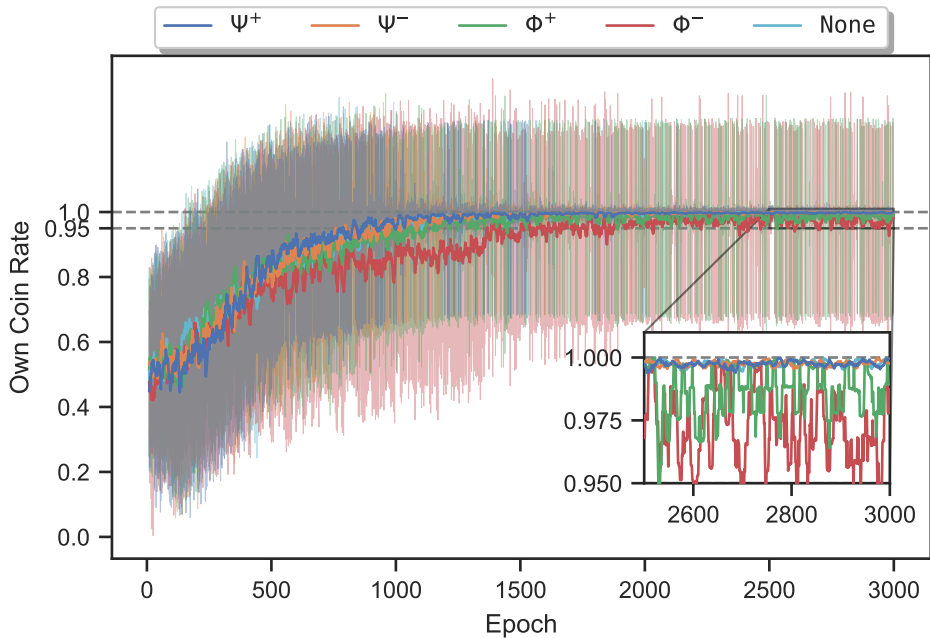

Supplement: supplementary_material [file attachment]

Own Coins Collected

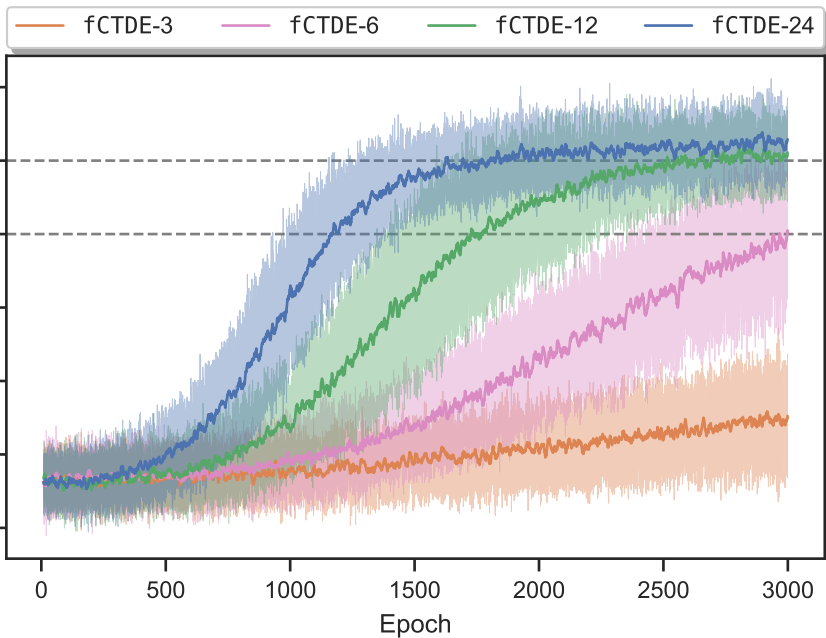

Supplement: supplementary_material [file attachment]

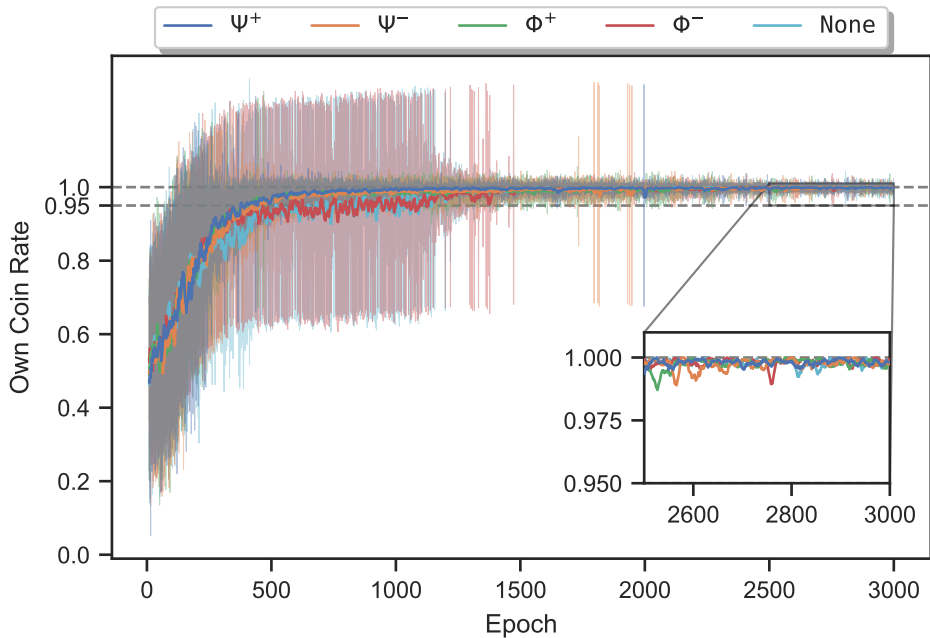

Supplement: supplementary_material [file attachment]

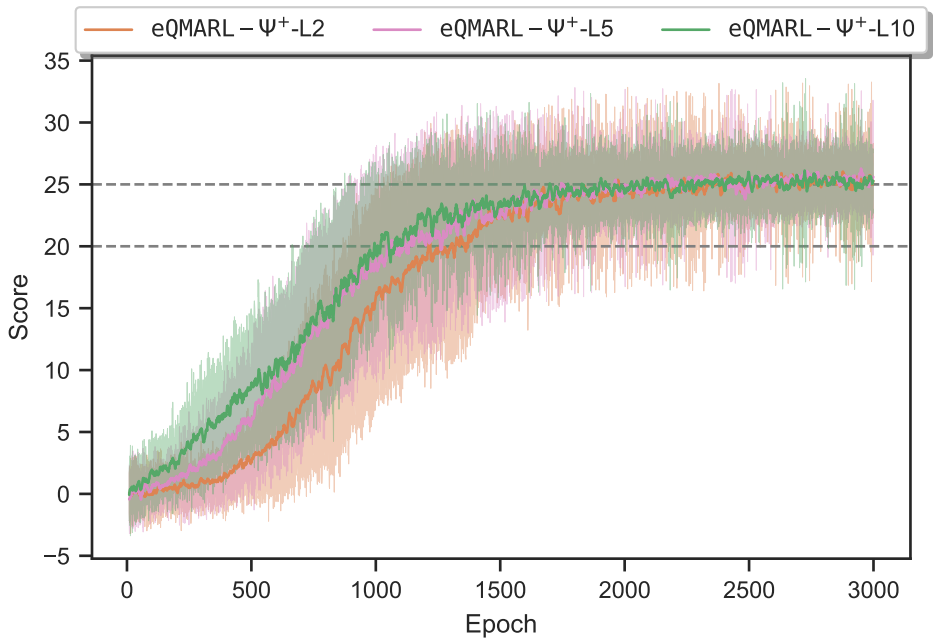

Supplement: supplementary_material [file attachment]

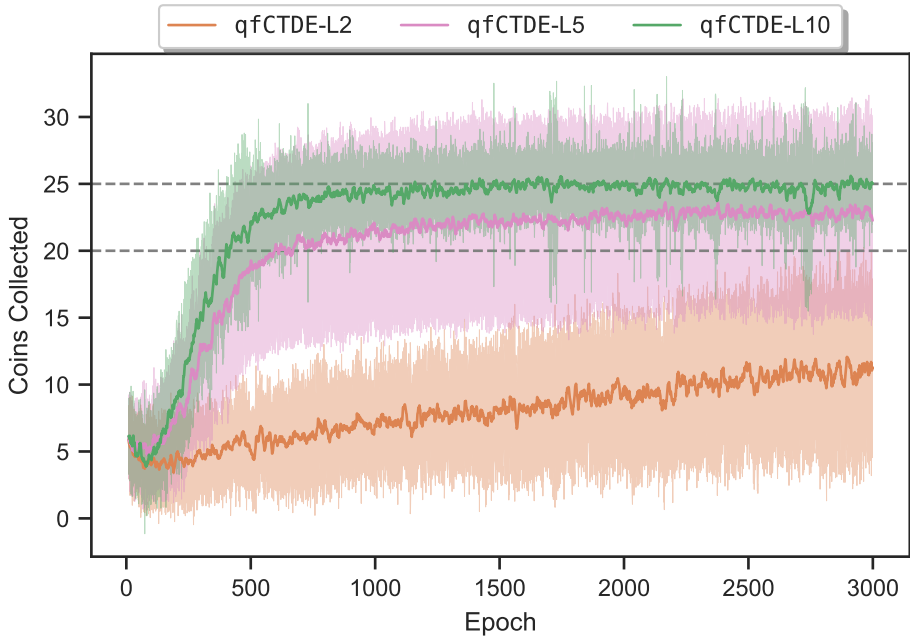

Supplement: supplementary_material [file attachment]

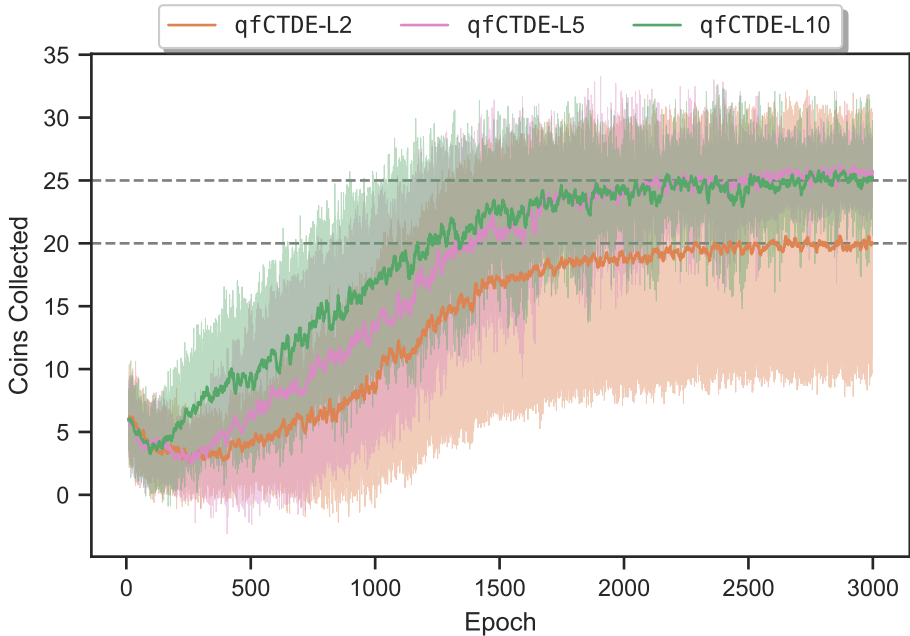

Supplement: supplementary_material [file attachment]

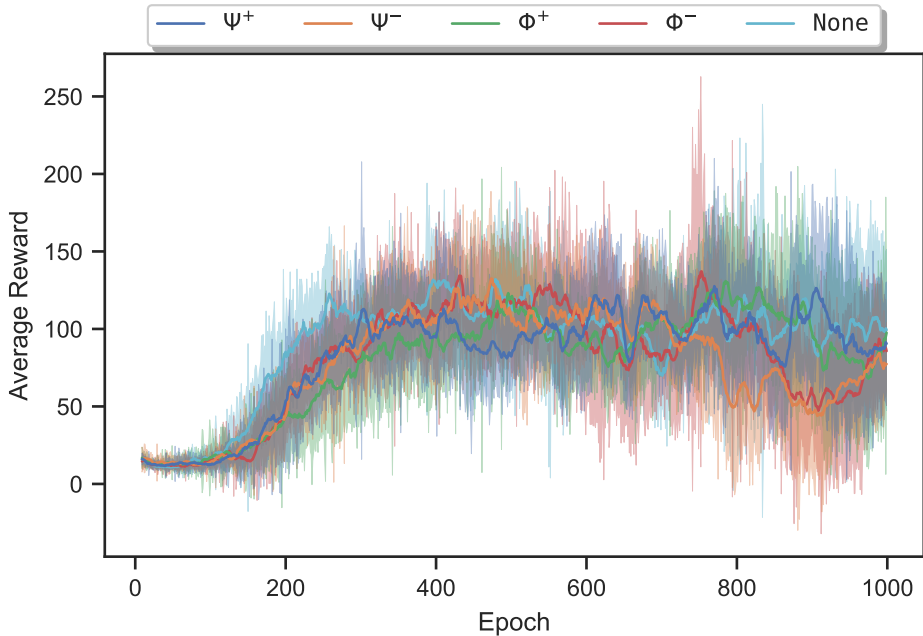

Supplement: supplementary_material [file attachment]

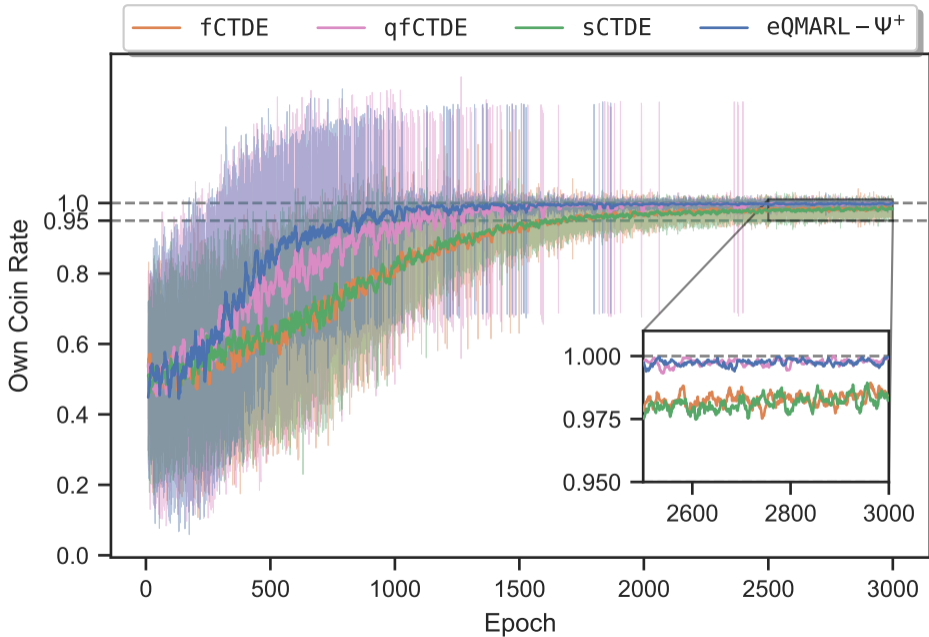

Supplement: supplementary_material [file attachment]

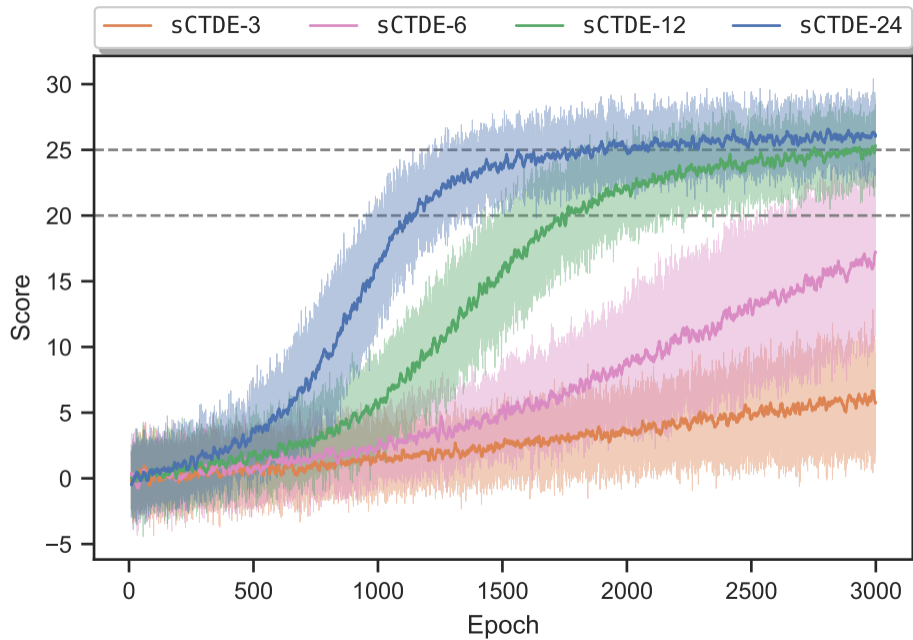

Supplement: supplementary_material [file attachment]

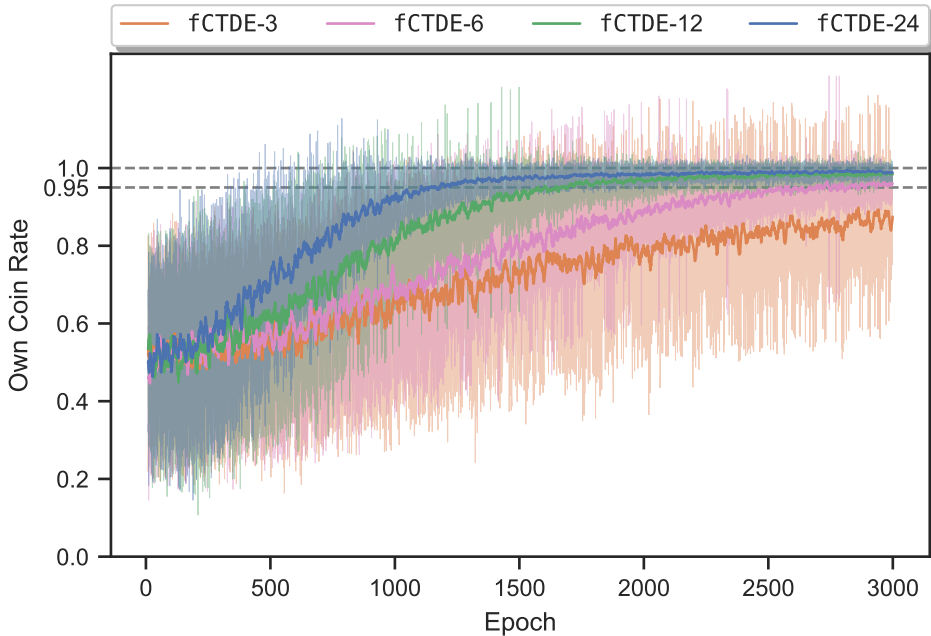

Supplement: supplementary_material [file attachment]

Own Coins Collected

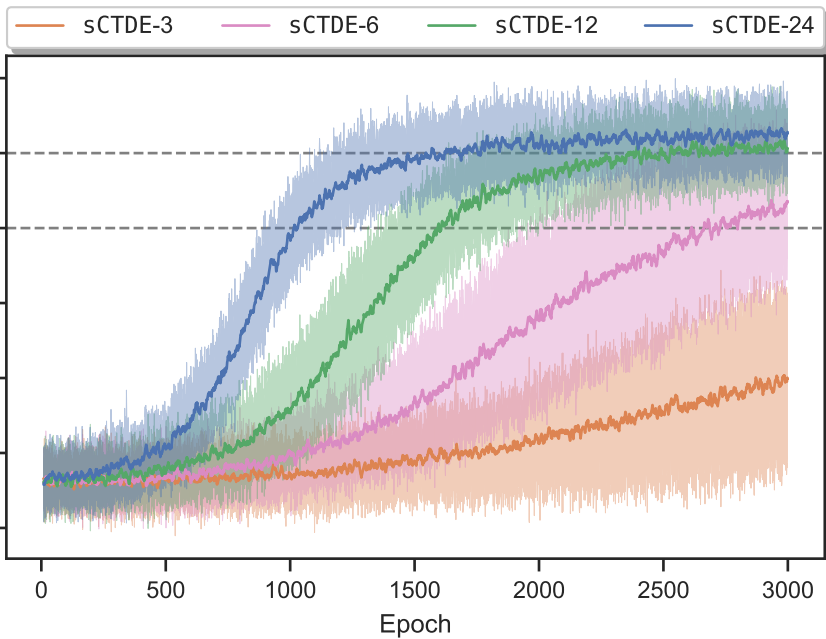

Supplement: supplementary_material [file attachment]

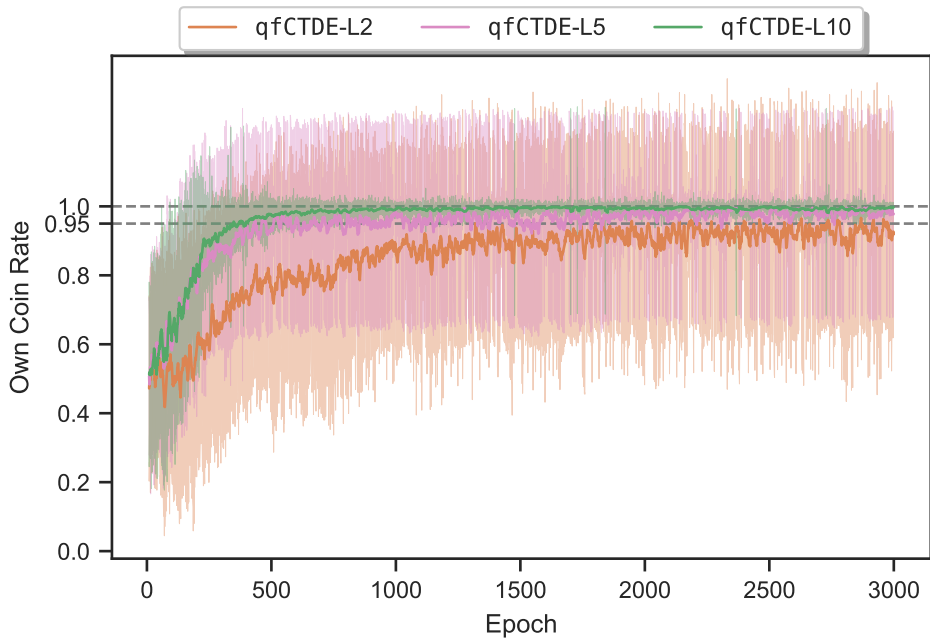

Supplement: supplementary_material [file attachment]

Own Coins Collected

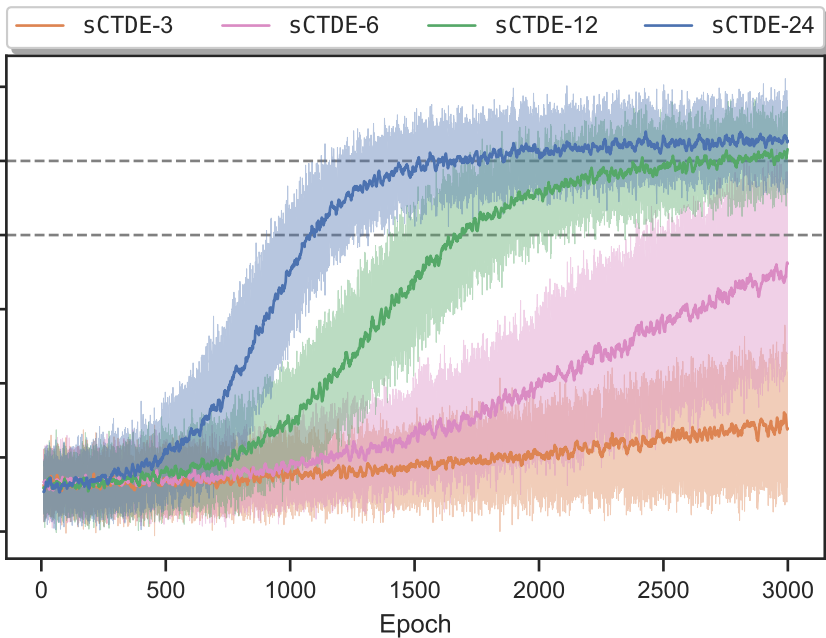

Supplement: supplementary_material [file attachment]

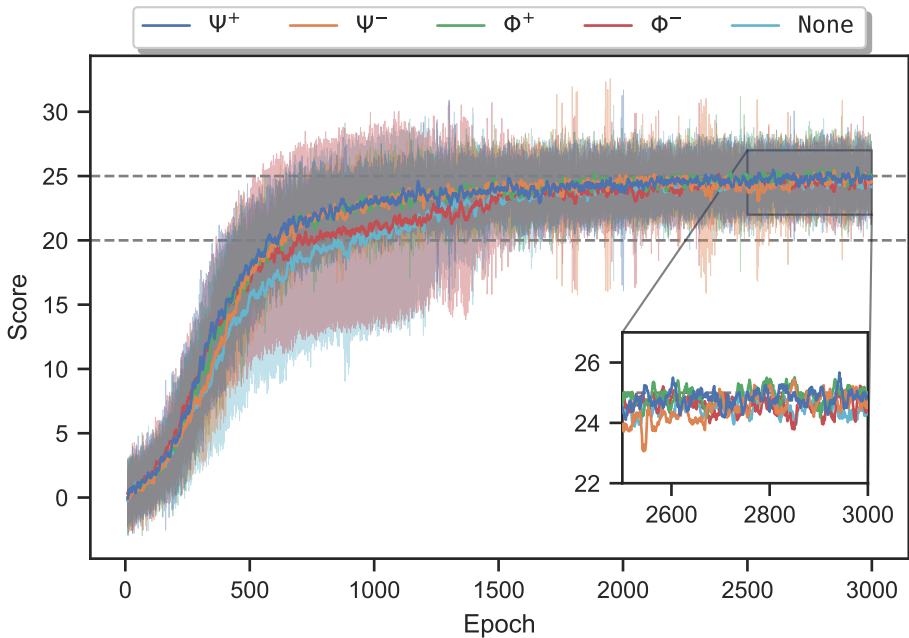

Supplement: supplementary_material [file attachment]

Own Coins Collected

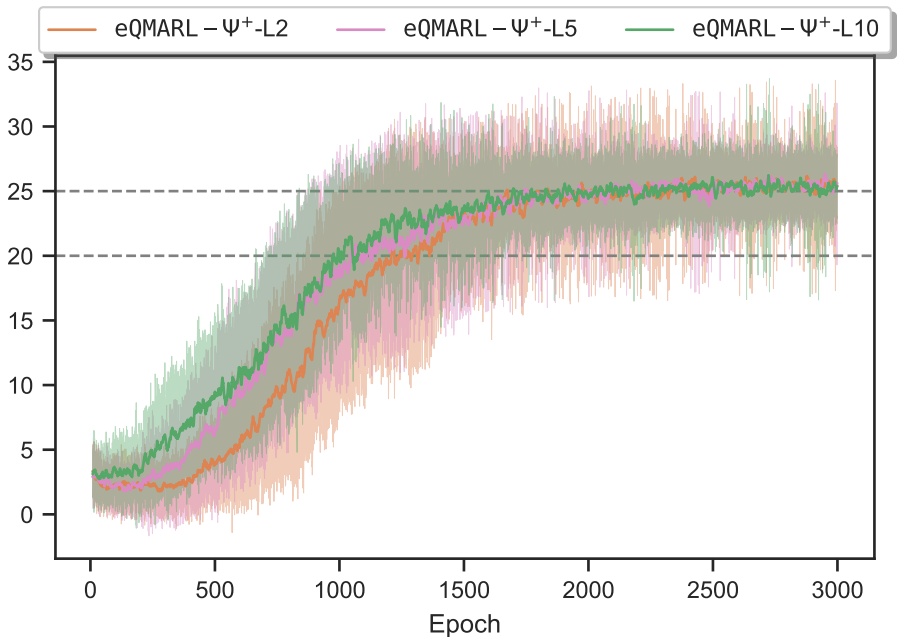

Supplement: supplementary_material [file attachment]

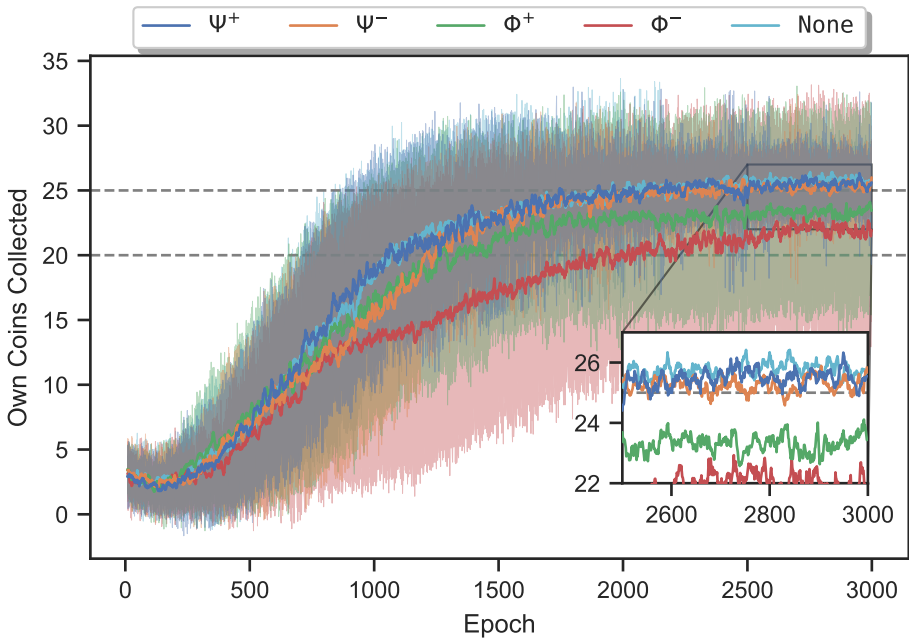

Supplement: supplementary_material [file attachment]

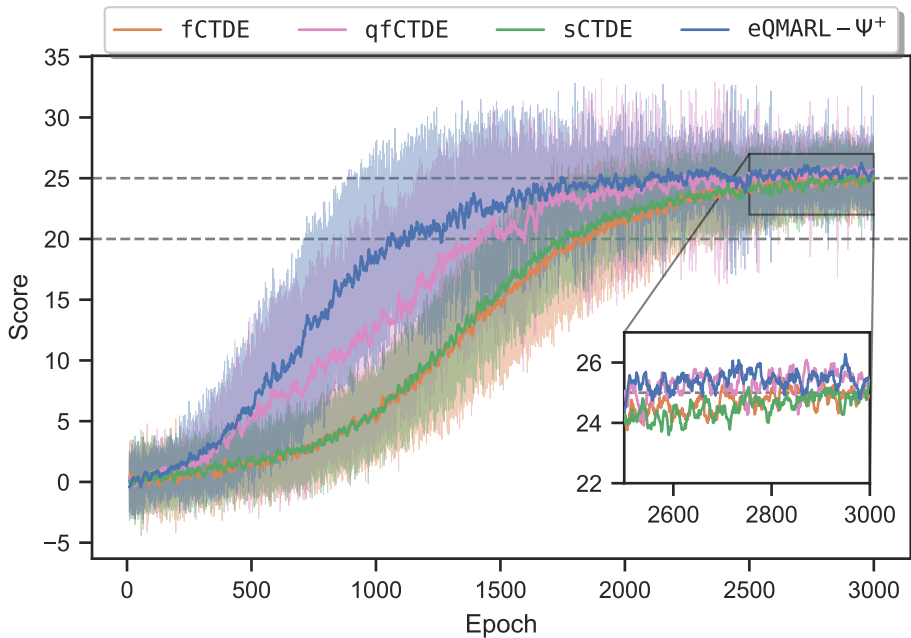

Supplement: supplementary_material [file attachment]

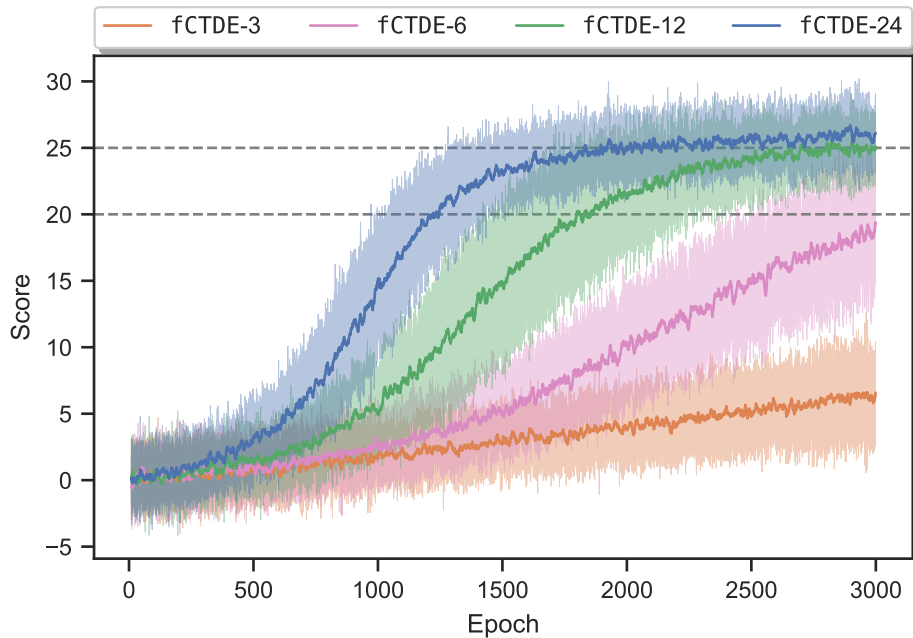

Supplement: supplementary_material [file attachment]
